# Supplementary material
Source: publisher figshare collection journal article supplement (https://karger.figshare.com/ndownloader/files/15343961)
Supplement: Supplementary file 1 [file 15343961]

**Table 3- Completeness of methodological information reported.**
